# Supplementary material
Source: PubMed Central journal article supplement (PMC8517590)
Supplement: IMM-164-507-s001.pdf [file IMM-164-507-s001.pdf]

## Supplemental Figures and figure legends

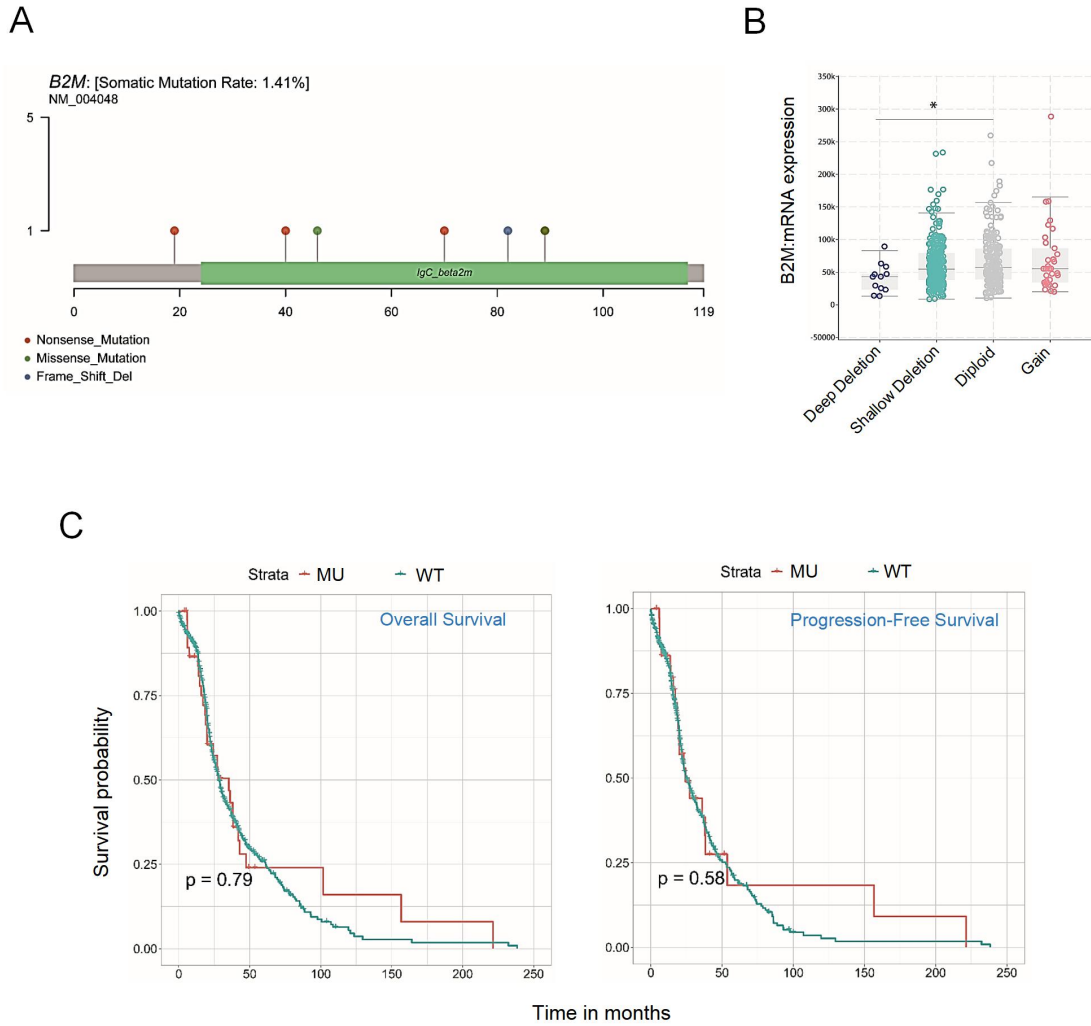

**Figure S1. Genetic alterations of the *B2M* gene in lung cancer.** (A) The frequency of *B2M* mutations and the positions and types of *B2M* genetic alterations in the LUAD dataset. (B) The influences of *B2M* CNV on the levels of *B2M* mRNA in the LUAD dataset. (C) The association between *B2M* mutation status and the survival of LUAD patients.

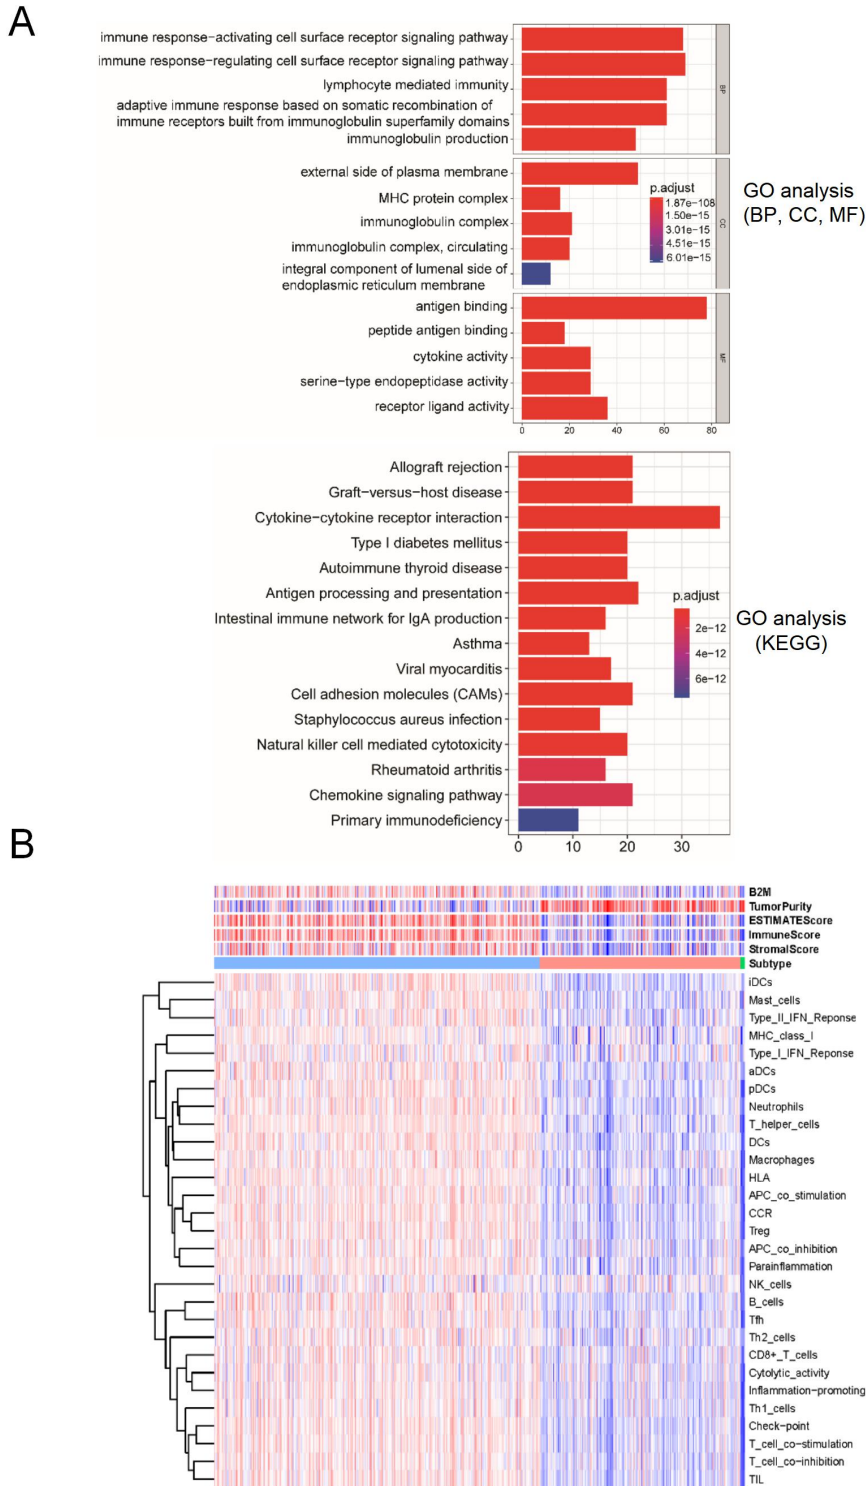

**Figure S2. B2M levels impact the immune landscape of lung cancer.** (A-B) GO analysis of differentially expressed genes between B2M<sup>hi</sup> vs. B2M<sup>lo</sup> tumors in the LUAD dataset. (C) The influence of B2M on the immune-related gene clusters in the LUAD tumors divided into immunity-L, -M, and -H groups.

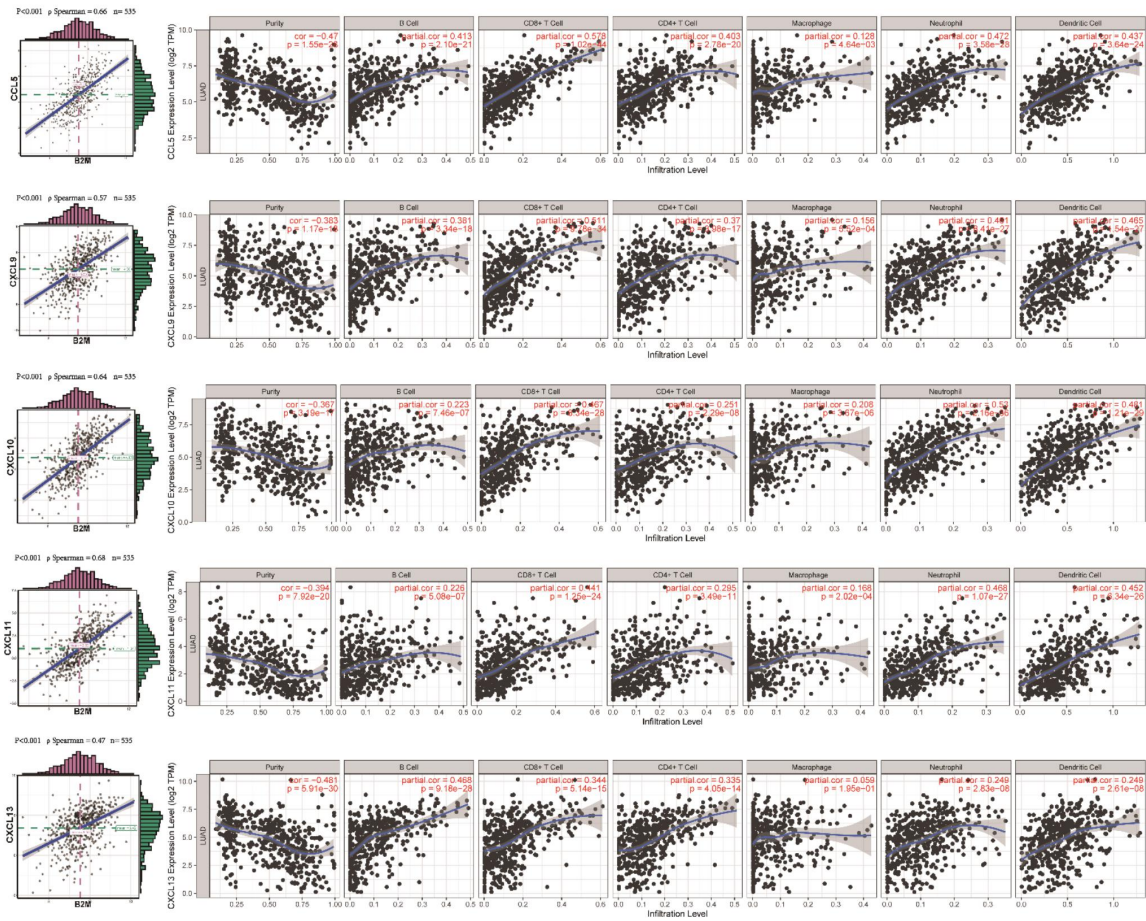

**Figure S3. The relationship between B2M and chemokines in lung cancer.** Positive correlations between B2M and chemokines, including CCL5, CXCL9, CXCL10, CXCL11, and CXCL13. The correlations between the levels of the indicated chemokines and the infiltration of various immune cell types.

A

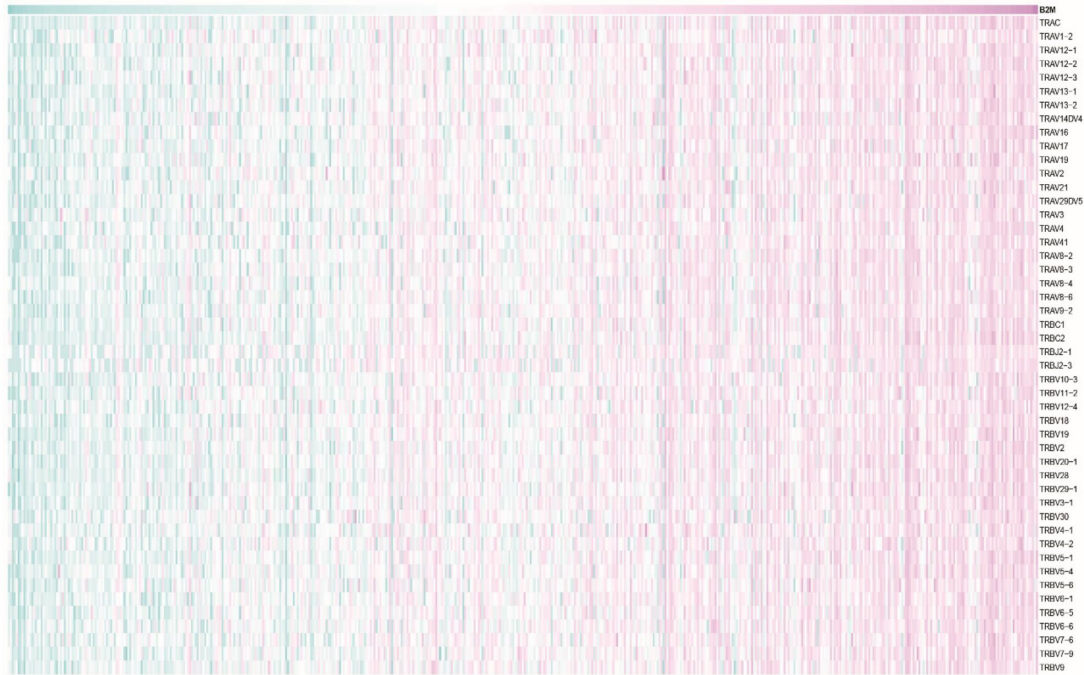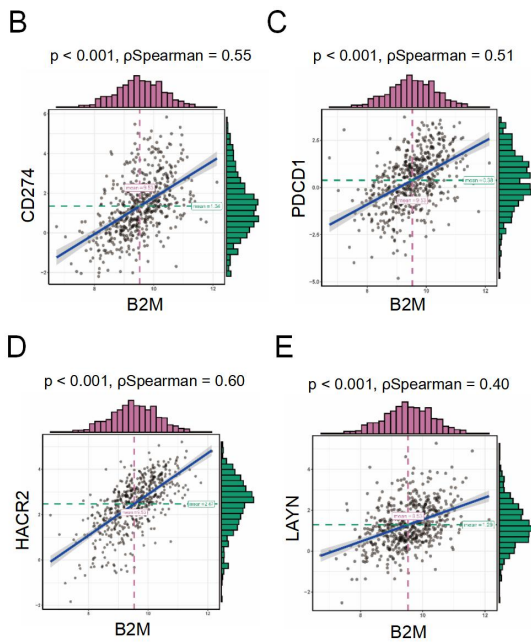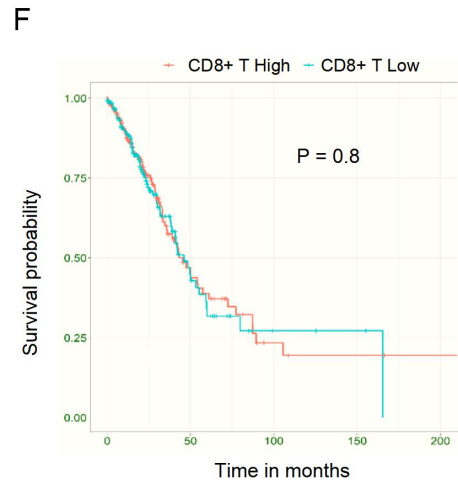

**Figure S4. The relationship between B2M levels and T cell recruitment and function.** (A) The correlations between the levels of B2M and TCR genes. (B-E) Positive correlations between B2M and T cell immune checkpoint molecules, including CD274, PDCD1, HACR2, and LAYN. (F) The association between the levels of CD8A and the survival time of lung cancer patients in the LUAD dataset.

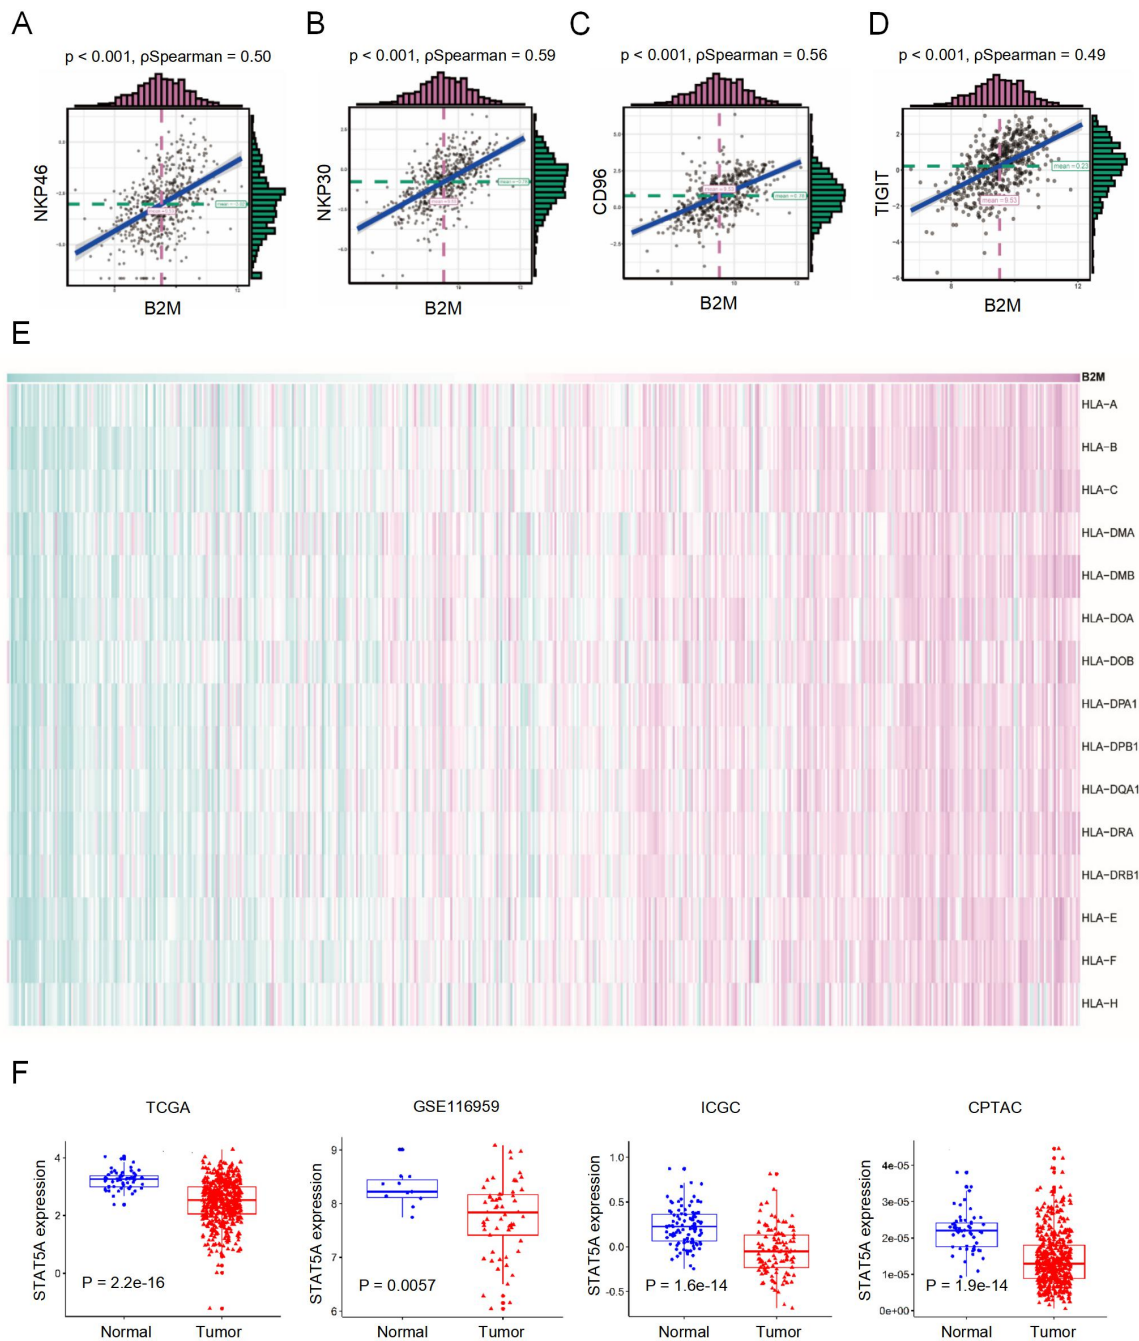

**Figure S5. The relationship between B2M levels and NK cell recruitment and activation.**

(A-D) Positive correlations between B2M and the NK cell markers NKP46 and NKP30 and the NK cell-associated checkpoint molecules CD96 and TIGIT. (E) The correlation between the levels of B2M and HLA-I molecules. (F) STAT5 levels in LUAD tumor tissues compared with normal tissues in the LUAD, GSE116959, ICGC, and CPTAC datasets.

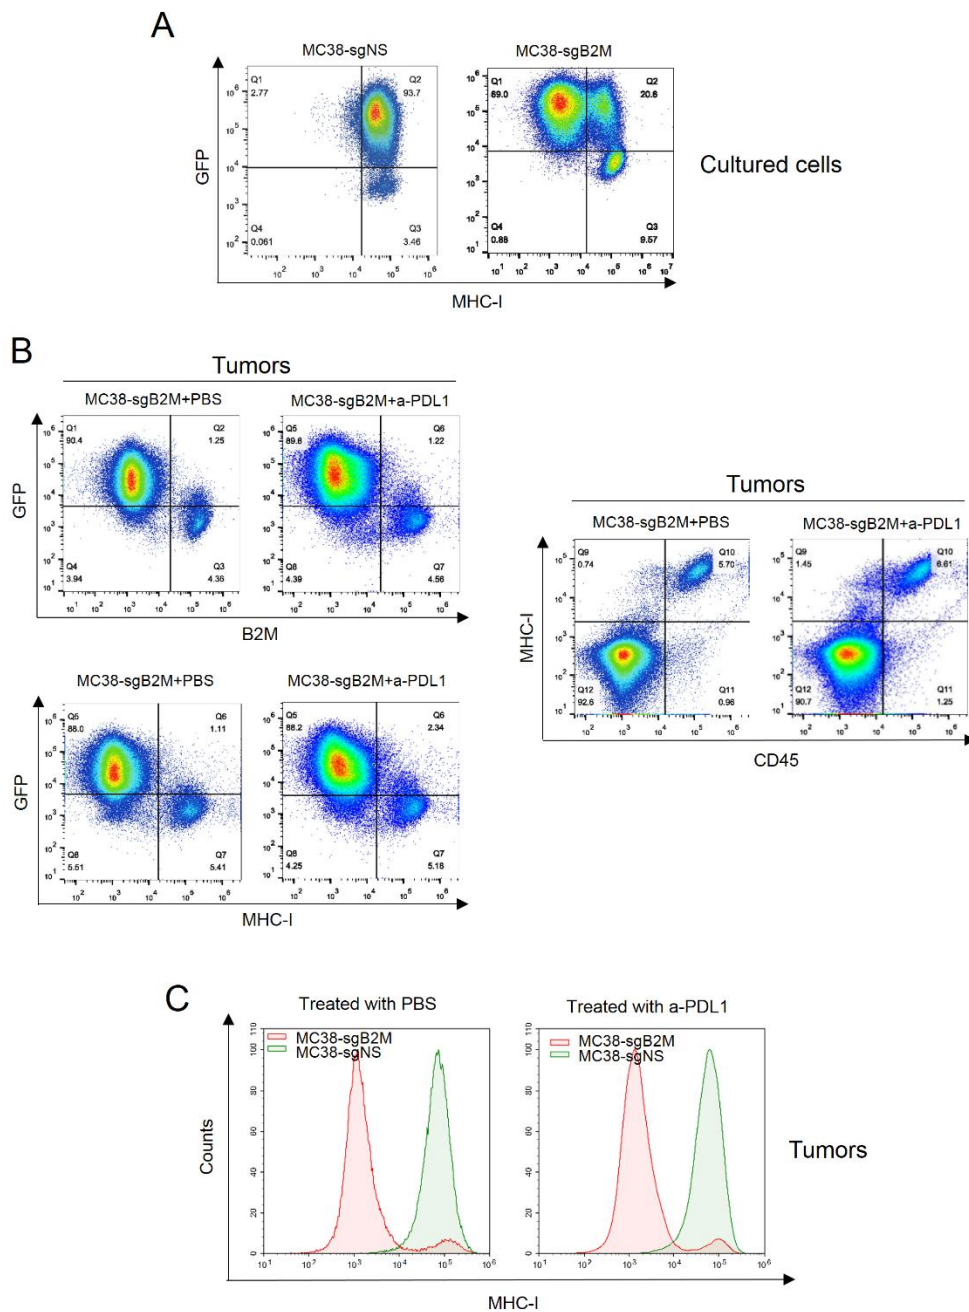

**Figure S6. The expression of B2M and MHC class I on MC38 cells in vitro and in vivo. (A)** FACS analysis of MHC class I on cultured MC38-sgNS and MC38-sgB2M cells in vitro. **(B)** FACS analysis of single-cell suspensions from MC38-sgB2M tumors treated with PBS or anti-PD-L1 for the expression of B2M, MHC class I, and CD45. **(C)** FACS analysis of single-cell suspensions from MC38-sgNS and MC38-sgB2M tumors treated with PBS or anti-PD-L1 for the expression of MHC class I.

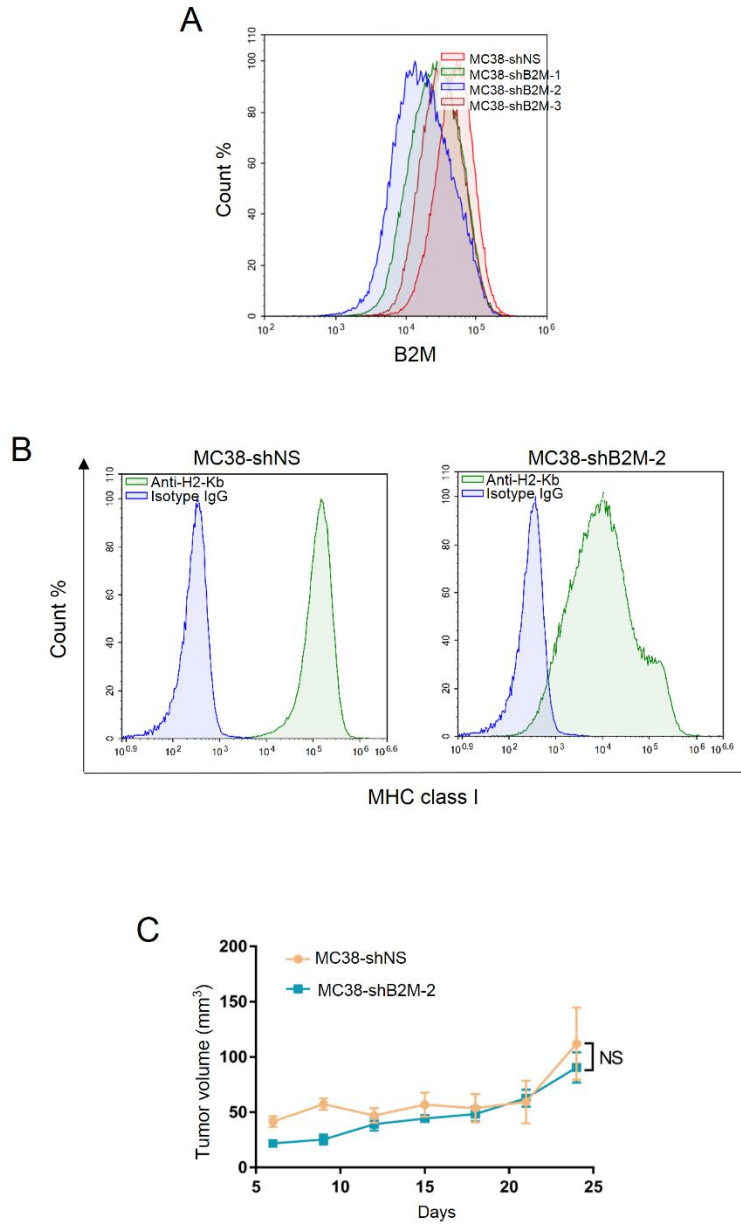

**Figure S7. Inhibition of B2M expression in MC38 models.** (A) FACS analysis of B2M on cells infected with lentivirus carrying nonspecific shRNA or shRNAs targeting B2M; the maximal inhibition of B2M cell surface expression was seen in MC38-shB2M-2 cells. (B) FACS analysis of MHC class I on MC38-shNS and MC38-shB2M-2 cells. (C) Subcutaneous tumors derived from MC38-shB2M-2 and MC38-shNS cells grew at a similar rate *in vivo*.

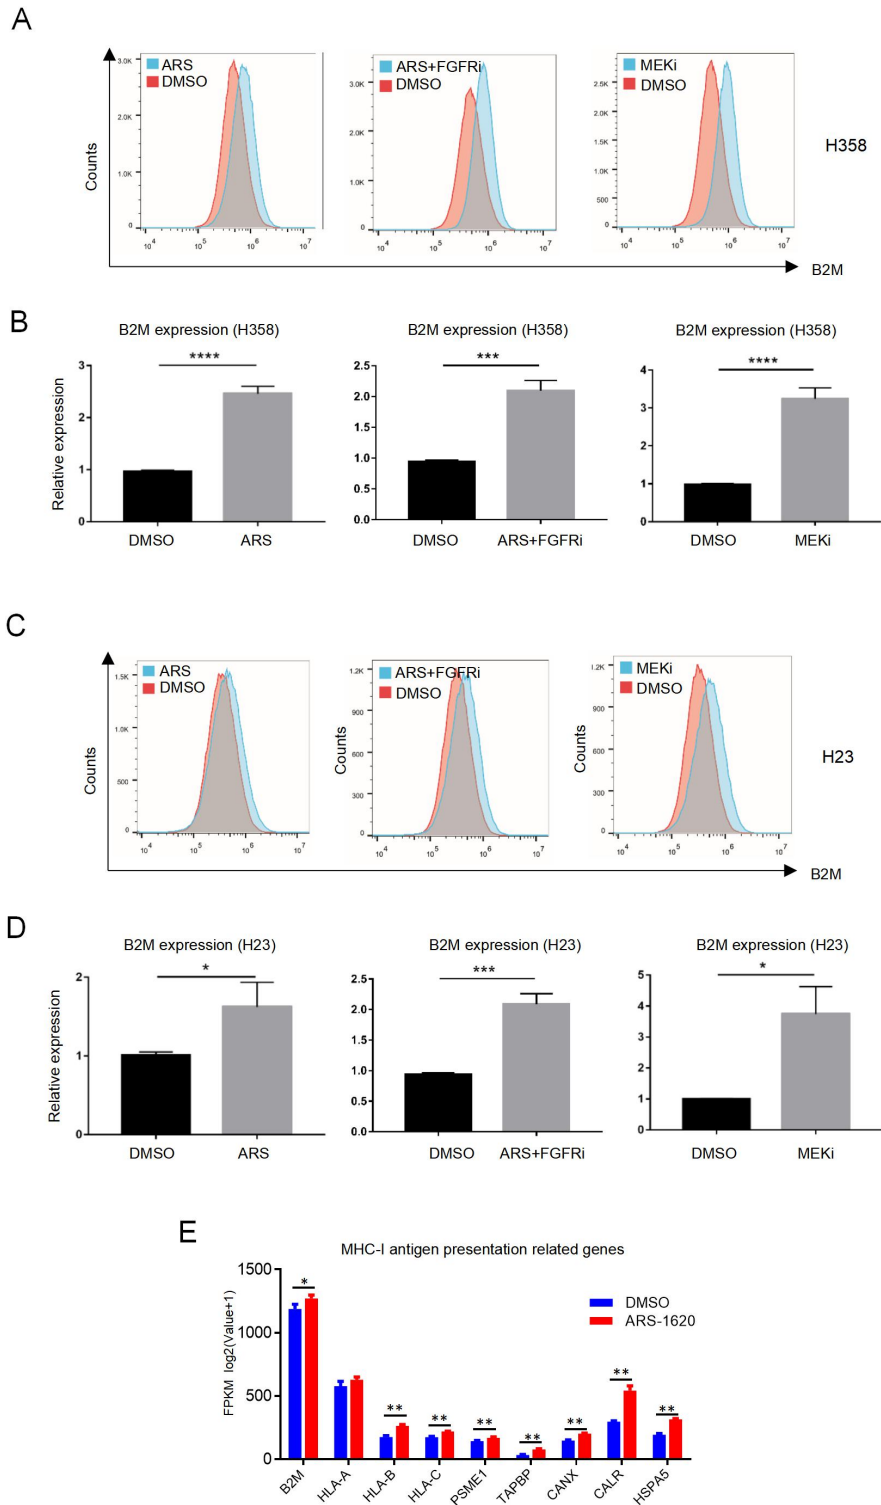

**Figure S8. Mutant KRAS inhibition upregulated B2M expression in lung cancer cells. (A)** FACS analysis of B2M on H358 cells treated with ARS-1620, ARS-1620+FGFR inhibitor



(FGFRi), or ERK inhibitor (ERKi) for 24 h compared with cells treated with DMSO. (B) Real-time PCR was used to determine the transcript levels of B2M in H358 cells treated with the indicated drugs for 24 h. (C-D) Similar experiments were conducted with H23 cells, as shown in Figure S7A and S7B. (E) RNA-seq data demonstrating the levels of the genes involved in antigen processing and presentation in H358 cells treated with ARS-1620 or DMSO for 24 h.
